# Supplementary material for: An Extensive Performance Comparison between Feature Reduction and Feature Selection Preprocessing Algorithms on Imbalanced Wide Data
Source: MDPI journal article supplement (doi:10.3390/info15040223), 2024-04-16
Supplement: s1 [file s1]

# Supplementary Materials: An Extensive Performance Comparison between Feature Reduction and Feature Selection Algorithm Preprocessing on Unbalanced Wide Data

Ismael Ramos-Pérez , José Antonio Barbero-Aparicio , Antonio Canepa-Oneto ,  
Álvar Arnaiz-González  and and Jesús M. Maudes-Raedo 

This document compiles the tables not included in the main document to simplify the results. These tables are obtained using all five metrics during the experimental process, all of them detailed in the main document.

The tables are divided into three groups:

- Tables [S1–S5](#) show the average rank of all feature reducers used in this study.
- The previous ranks divided by the five classifiers are shown in Tables [S6–S10](#) to see which feature reducer perform better on each classifier.
- Tables [S11–S15](#) show the average rank of each of the seven balancing strategy for both the best feature reducer and feature selector algorithms we compare at the end of the study.

All the table groups are ordered by the metric used to calculate it (MCC,  $F_1$ -Score, Kappa, AUC and G-Mean). In all groups, two slightly different behaviours can be found depending on the metric in use:  $F_1$ -Score, Kappa as first group, AUC and G-Mean as second group. This difference is portrayed in the main document Bayesian tests, where for the first group ( $F_1$ -Score, MCC, and Kappa) the feature reduction option performed significantly better than the feature selection. Meanwhile, the other group (AUC and G-Mean) does not show enough significant difference on the used datasets.

**Table S1.** Comparison of average ranks using the MCC metric, the 90 possible configurations when mixing our 5 classifiers and the 18 FR preprocessing methods, including as baseline the non-preprocessing option. The color code indicates the type of algorithm, linear unsupervised, linear supervised or non-linear unsupervised .

| Classifier | FR algorithm | Avg. Rank |
|------------|--------------|-----------|
| KNN        | MMC          | 1.96      |
| SVM-G      | No           | 2.54      |
| SVM-G      | FSCORE       | 9.21      |
| KNN        | FSCORE       | 9.29      |
| KNN        | No           | 10.71     |
| SVM-G      | LLE          | 10.71     |
| SVM-G      | MDS          | 10.71     |
| SVM-G      | MMDS         | 10.71     |
| RF         | FSCORE       | 13.39     |
| KNN        | LLE          | 13.57     |
| NBayes     | FSCORE       | 14.79     |
| NBayes     | No           | 15.36     |
| KNN        | MDS          | 15.43     |
| KNN        | MMDS         | 15.43     |
| SVM-G      | NPE          | 15.43     |
| KNN        | PCA          | 16.64     |
| SVM-G      | SNE          | 19.36     |
| RF         | No           | 19.39     |
| KNN        | NPE          | 21.00     |
| NBayes     | LLE          | 21.64     |
| SVM-G      | Autoencoder  | 21.86     |
| KNN        | SNE          | 22.07     |
| KNN        | LPE          | 22.79     |
| NBayes     | MDS          | 26.50     |
| NBayes     | MMDS         | 26.50     |
| C4.5       | FSCORE       | 28.11     |
| NBayes     | NPE          | 29.57     |
| NBayes     | SNE          | 29.93     |
| KNN        | Autoencoder  | 30.36     |
| C4.5       | No           | 30.68     |
| C4.5       | NPE          | 30.86     |
| NBayes     | PCA          | 31.36     |
| C4.5       | MDS          | 34.14     |
| SVM-G      | LSLS         | 34.21     |
| KNN        | SAVE         | 34.36     |
| RF         | NPE          | 34.43     |
| NBayes     | Autoencoder  | 34.64     |
| C4.5       | PCA          | 35.21     |
| C4.5       | LLE          | 35.57     |
| C4.5       | MMDS         | 37.00     |
| RF         | Autoencoder  | 38.71     |
| SVM-G      | LPE          | 38.79     |
| C4.5       | LPE          | 40.07     |
| KNN        | LSLS         | 40.50     |
| NBayes     | LSLS         | 42.86     |

| Classifier | FR algorithm | Avg. Rank |
|------------|--------------|-----------|
| RF         | LSLS         | 43.93     |
| C4.5       | Autoencoder  | 46.00     |
| C4.5       | LSLS         | 49.64     |
| C4.5       | MMC          | 49.93     |
| RF         | LPE          | 50.43     |
| SVM-G      | SAVE         | 52.14     |
| RF         | SAVE         | 52.36     |
| SVM-G      | LEA          | 53.43     |
| RF         | MMDS         | 56.64     |
| SVM-G      | RNDPROJ      | 56.64     |
| C4.5       | SNE          | 57.21     |
| RF         | MDS          | 57.64     |
| RF         | PCA          | 58.50     |
| NBayes     | LPE          | 59.43     |
| RF         | LLE          | 59.50     |
| NBayes     | LEA          | 61.29     |
| NBayes     | SAVE         | 62.14     |
| RF         | LEA          | 62.21     |
| RF         | MMC          | 62.50     |
| KNN        | LEA          | 63.21     |
| C4.5       | SAVE         | 65.00     |
| KNN        | RNDPROJ      | 67.43     |
| NBayes     | RNDPROJ      | 67.50     |
| NBayes     | MMC          | 67.93     |
| RF         | RNDPROJ      | 70.50     |
| KNN        | LFDA         | 71.93     |
| RF         | SNE          | 73.89     |
| C4.5       | RNDPROJ      | 76.07     |
| KNN        | SLPE         | 77.00     |
| C4.5       | SLPE         | 78.11     |
| RF         | LFDA         | 78.14     |
| RF         | SLPE         | 78.21     |
| KNN        | PFLPP        | 78.43     |
| RF         | PFLPP        | 78.64     |
| SVM-G      | SLPE         | 78.75     |
| C4.5       | LEA          | 79.29     |
| C4.5       | PFLPP        | 79.29     |
| NBayes     | PFLPP        | 79.29     |
| SVM-G      | LFDA         | 79.29     |
| SVM-G      | MMC          | 79.29     |
| SVM-G      | PCA          | 79.29     |
| SVM-G      | PFLPP        | 79.29     |
| NBayes     | SLPE         | 79.43     |
| C4.5       | LFDA         | 79.79     |
| NBayes     | LFDA         | 80.11     |

**Table S2.** Comparison of average ranks using the  $F_1$ -Score metric, the 90 possible configurations when mixing our 5 classifiers and the 18 FR preprocessing methods, including as baseline the non-preprocessing option. The color code indicates the type of algorithm, linear unsupervised, linear supervised or non-linear unsupervised.

| Classifier | FR algorithm | Avg. Rank |
|------------|--------------|-----------|
| KNN        | MMC          | 1.89      |
| SVM-G      | No           | 2.71      |
| SVM-G      | FSCORE       | 8.86      |
| KNN        | FSCORE       | 9.00      |
| KNN        | No           | 10.36     |
| SVM-G      | LLE          | 11.64     |
| SVM-G      | MDS          | 11.64     |
| SVM-G      | MMDS         | 11.64     |
| KNN        | LLE          | 12.21     |
| NBayes     | No           | 13.57     |
| NBayes     | FSCORE       | 13.93     |
| RF         | FSCORE       | 14.46     |
| KNN        | MDS          | 15.36     |
| KNN        | MMDS         | 15.36     |
| KNN        | PCA          | 16.21     |
| SVM-G      | NPE          | 18.93     |
| NBayes     | LLE          | 20.36     |
| SVM-G      | Autoencoder  | 21.29     |
| KNN        | NPE          | 21.64     |
| KNN        | LPE          | 22.00     |
| KNN        | SNE          | 22.21     |
| SVM-G      | SNE          | 23.57     |
| NBayes     | MDS          | 24.79     |
| NBayes     | MMDS         | 24.79     |
| C4.5       | FSCORE       | 26.04     |
| RF         | No           | 26.57     |
| NBayes     | NPE          | 26.64     |
| KNN        | Autoencoder  | 28.29     |
| C4.5       | No           | 28.32     |
| NBayes     | PCA          | 29.14     |
| NBayes     | Autoencoder  | 30.93     |
| SVM-G      | LSLS         | 31.43     |
| NBayes     | SNE          | 31.93     |
| C4.5       | PCA          | 33.14     |
| KNN        | SAVE         | 33.71     |
| C4.5       | MDS          | 35.29     |
| C4.5       | NPE          | 35.43     |
| SVM-G      | LPE          | 36.79     |
| C4.5       | LPE          | 38.00     |
| C4.5       | MMDS         | 38.00     |
| C4.5       | LLE          | 38.21     |
| KNN        | LSLS         | 38.79     |
| NBayes     | LSLS         | 38.86     |
| C4.5       | Autoencoder  | 42.57     |
| RF         | NPE          | 42.64     |

| Classifier | FR algorithm | Avg. Rank |
|------------|--------------|-----------|
| SVM-G      | SAVE         | 46.64     |
| C4.5       | LSLS         | 47.43     |
| RF         | Autoencoder  | 47.43     |
| RF         | LSLS         | 52.21     |
| RF         | MMC          | 54.57     |
| RF         | SAVE         | 55.57     |
| C4.5       | MMC          | 56.00     |
| NBayes     | RNDPROJ      | 56.64     |
| SVM-G      | MMC          | 57.29     |
| NBayes     | LPE          | 57.86     |
| C4.5       | SAVE         | 58.00     |
| NBayes     | LEA          | 59.79     |
| KNN        | LEA          | 61.07     |
| SVM-G      | LFDA         | 61.18     |
| KNN        | LFDA         | 61.21     |
| NBayes     | MMC          | 61.79     |
| RF         | LFDA         | 61.79     |
| SVM-G      | RNDPROJ      | 62.11     |
| RF         | LPE          | 62.14     |
| C4.5       | SNE          | 63.07     |
| SVM-G      | LEA          | 63.07     |
| KNN        | RNDPROJ      | 63.93     |
| C4.5       | LFDA         | 64.36     |
| RF         | MMDS         | 67.00     |
| RF         | SLPE         | 67.43     |
| RF         | LEA          | 67.71     |
| RF         | MDS          | 67.86     |
| RF         | RNDPROJ      | 68.43     |
| RF         | PCA          | 68.93     |
| RF         | LLE          | 70.82     |
| RF         | PFLPP        | 71.00     |
| NBayes     | SAVE         | 72.25     |
| SVM-G      | PFLPP        | 73.39     |
| KNN        | SLPE         | 74.29     |
| KNN        | PFLPP        | 74.57     |
| SVM-G      | SLPE         | 75.57     |
| C4.5       | RNDPROJ      | 79.71     |
| RF         | SNE          | 84.00     |
| NBayes     | SLPE         | 84.21     |
| NBayes     | LFDA         | 84.79     |
| C4.5       | SLPE         | 84.82     |
| SVM-G      | PCA          | 85.18     |
| C4.5       | LEA          | 86.25     |
| C4.5       | PFLPP        | 86.25     |
| NBayes     | PFLPP        | 86.25     |

**Table S3.** Comparison of average ranks using the Kappa metric, the 90 possible configurations when mixing our 5 classifiers and the 18 FR preprocessing methods, including as baseline the non-preprocessing option. The color code indicates the type of algorithm, linear unsupervised, linear supervised or non-linear unsupervised.

| Classifier | FR algorithm | Avg. Rank |
|------------|--------------|-----------|
| KNN        | MMC          | 1.82      |
| SVM-G      | No           | 2.71      |
| SVM-G      | FSCORE       | 8.43      |
| KNN        | FSCORE       | 8.79      |
| KNN        | No           | 10.07     |
| SVM-G      | LLE          | 11.00     |
| SVM-G      | MDS          | 11.00     |
| SVM-G      | MMDS         | 11.00     |
| KNN        | LLE          | 12.93     |
| RF         | FSCORE       | 13.25     |
| NBayes     | No           | 14.86     |
| NBayes     | FSCORE       | 15.00     |
| KNN        | MDS          | 15.46     |
| KNN        | MMDS         | 15.46     |
| SVM-G      | NPE          | 16.43     |
| KNN        | PCA          | 17.00     |
| SVM-G      | SNE          | 20.21     |
| KNN        | NPE          | 20.93     |
| SVM-G      | Autoencoder  | 21.07     |
| KNN        | SNE          | 21.50     |
| RF         | No           | 21.71     |
| NBayes     | LLE          | 22.43     |
| KNN        | LPE          | 22.86     |
| NBayes     | MDS          | 26.29     |
| NBayes     | MMDS         | 26.29     |
| C4.5       | FSCORE       | 27.25     |
| KNN        | Autoencoder  | 28.21     |
| C4.5       | No           | 28.82     |
| NBayes     | SNE          | 30.71     |
| NBayes     | NPE          | 31.07     |
| NBayes     | PCA          | 31.57     |
| C4.5       | NPE          | 32.00     |
| SVM-G      | LSLS         | 32.71     |
| KNN        | SAVE         | 33.43     |
| NBayes     | Autoencoder  | 33.71     |
| C4.5       | PCA          | 33.93     |
| C4.5       | MDS          | 34.07     |
| C4.5       | LLE          | 35.93     |
| RF         | NPE          | 37.00     |
| C4.5       | MMDS         | 37.21     |
| SVM-G      | LPE          | 37.43     |
| C4.5       | LPE          | 38.93     |
| KNN        | LSLS         | 39.57     |
| RF         | Autoencoder  | 40.64     |
| NBayes     | LSLS         | 41.86     |

| Classifier | FR algorithm | Avg. Rank |
|------------|--------------|-----------|
| C4.5       | Autoencoder  | 44.21     |
| RF         | LSLS         | 45.43     |
| C4.5       | LSLS         | 47.71     |
| SVM-G      | SAVE         | 50.29     |
| RF         | SAVE         | 51.07     |
| RF         | LPE          | 52.86     |
| SVM-G      | LEA          | 52.93     |
| C4.5       | MMC          | 55.00     |
| SVM-G      | RNDPROJ      | 57.00     |
| C4.5       | SNE          | 57.07     |
| RF         | MMDS         | 59.00     |
| NBayes     | LPE          | 59.21     |
| RF         | MDS          | 59.57     |
| RF         | PCA          | 59.57     |
| NBayes     | LEA          | 60.57     |
| RF         | LLE          | 61.21     |
| RF         | MMC          | 61.79     |
| KNN        | LEA          | 62.00     |
| RF         | LEA          | 62.07     |
| NBayes     | SAVE         | 63.36     |
| C4.5       | SAVE         | 64.29     |
| KNN        | RNDPROJ      | 66.00     |
| NBayes     | RNDPROJ      | 67.29     |
| NBayes     | MMC          | 67.50     |
| RF         | RNDPROJ      | 69.00     |
| KNN        | LFDA         | 71.29     |
| RF         | SNE          | 74.75     |
| C4.5       | RNDPROJ      | 75.43     |
| C4.5       | SLPE         | 77.96     |
| RF         | SLPE         | 78.07     |
| RF         | PFLPP        | 78.43     |
| KNN        | PFLPP        | 78.50     |
| KNN        | SLPE         | 78.50     |
| SVM-G      | SLPE         | 78.75     |
| C4.5       | LEA          | 79.21     |
| C4.5       | PFLPP        | 79.21     |
| NBayes     | PFLPP        | 79.21     |
| RF         | LFDA         | 79.21     |
| SVM-G      | LFDA         | 79.21     |
| SVM-G      | MMC          | 79.21     |
| SVM-G      | PCA          | 79.21     |
| SVM-G      | PFLPP        | 79.21     |
| NBayes     | SLPE         | 79.29     |
| C4.5       | LFDA         | 79.71     |
| NBayes     | LFDA         | 80.04     |

**Table S4.** Comparison of average ranks using the AUC metric, the 90 possible configurations when mixing our 5 classifiers and the 18 FR preprocessing methods, including as baseline the non-preprocessing option. The color code indicates the type of algorithm, linear unsupervised, linear supervised or non-linear unsupervised.

| Classifier | FR algorithm | Avg. Rank |
|------------|--------------|-----------|
| RF         | No           | 3.32      |
| SVM-G      | No           | 3.57      |
| KNN        | MMC          | 4.14      |
| KNN        | FSCORE       | 7.11      |
| RF         | FSCORE       | 7.54      |
| SVM-G      | FSCORE       | 8.82      |
| KNN        | No           | 11.46     |
| RF         | LSLS         | 15.86     |
| KNN        | LLE          | 16.14     |
| KNN        | PCA          | 17.00     |
| SVM-G      | LLE          | 17.39     |
| SVM-G      | MDS          | 17.39     |
| SVM-G      | MMDS         | 17.39     |
| KNN        | MDS          | 19.14     |
| KNN        | MMDS         | 19.14     |
| NBayes     | No           | 19.36     |
| RF         | LPE          | 19.71     |
| NBayes     | LLE          | 21.36     |
| KNN        | LPE          | 22.00     |
| SVM-G      | Autoencoder  | 25.07     |
| SVM-G      | NPE          | 25.39     |
| KNN        | SNE          | 25.50     |
| NBayes     | FSCORE       | 25.64     |
| NBayes     | MDS          | 27.00     |
| NBayes     | MMDS         | 27.00     |
| KNN        | NPE          | 27.14     |
| KNN        | SAVE         | 28.79     |
| C4.5       | FSCORE       | 29.32     |
| SVM-G      | SNE          | 30.11     |
| NBayes     | NPE          | 31.00     |
| C4.5       | No           | 31.25     |
| C4.5       | PCA          | 31.79     |
| KNN        | Autoencoder  | 32.50     |
| SVM-G      | LSLS         | 33.21     |
| NBayes     | SNE          | 33.50     |
| C4.5       | LPE          | 34.07     |
| NBayes     | Autoencoder  | 34.14     |
| RF         | PCA          | 34.43     |
| NBayes     | PCA          | 36.86     |
| C4.5       | NPE          | 38.00     |
| KNN        | LSLS         | 38.07     |
| C4.5       | MDS          | 39.14     |
| RF         | SAVE         | 40.00     |
| C4.5       | MMDS         | 41.07     |
| C4.5       | LLE          | 41.14     |

| Classifier | FR algorithm | Avg. Rank |
|------------|--------------|-----------|
| SVM-G      | LPE          | 44.18     |
| SVM-G      | RNDPROJ      | 44.29     |
| RF         | NPE          | 44.46     |
| C4.5       | Autoencoder  | 45.57     |
| NBayes     | LSLS         | 45.86     |
| RF         | Autoencoder  | 46.00     |
| NBayes     | SAVE         | 47.86     |
| C4.5       | LSLS         | 49.86     |
| C4.5       | MMC          | 52.57     |
| SVM-G      | LEA          | 55.14     |
| C4.5       | SNE          | 57.36     |
| SVM-G      | SAVE         | 57.43     |
| NBayes     | LEA          | 58.43     |
| RF         | MMDS         | 58.86     |
| RF         | MDS          | 59.29     |
| RF         | RNDPROJ      | 60.00     |
| RF         | LLE          | 60.36     |
| KNN        | LEA          | 60.57     |
| RF         | LEA          | 60.79     |
| KNN        | RNDPROJ      | 63.71     |
| NBayes     | MMC          | 65.07     |
| NBayes     | LPE          | 66.14     |
| C4.5       | RNDPROJ      | 67.43     |
| RF         | SNE          | 68.79     |
| C4.5       | SAVE         | 70.93     |
| C4.5       | LEA          | 71.68     |
| C4.5       | PFLPP        | 71.68     |
| NBayes     | PFLPP        | 71.68     |
| NBayes     | SLPE         | 71.68     |
| C4.5       | SLPE         | 72.57     |
| NBayes     | LFDA         | 72.79     |
| SVM-G      | PCA          | 73.54     |
| NBayes     | RNDPROJ      | 76.07     |
| RF         | MMC          | 77.43     |
| KNN        | PFLPP        | 78.50     |
| KNN        | SLPE         | 78.93     |
| KNN        | LFDA         | 79.29     |
| C4.5       | LFDA         | 82.25     |
| RF         | PFLPP        | 82.50     |
| RF         | SLPE         | 83.29     |
| RF         | LFDA         | 83.57     |
| SVM-G      | SLPE         | 83.86     |
| SVM-G      | PFLPP        | 86.04     |
| SVM-G      | LFDA         | 88.46     |
| SVM-G      | MMC          | 89.29     |

**Table S5.** Comparison of average ranks using the G-mean metric, the 90 possible configurations when mixing our 5 classifiers and the 18 FR preprocessing methods, including as baseline the non-preprocessing option. The color code indicates the type of algorithm, linear unsupervised, linear supervised or non-linear unsupervised.

| Classifier | FR algorithm | Avg. Rank |
|------------|--------------|-----------|
| RF         | No           | 3.32      |
| SVM-G      | No           | 3.50      |
| KNN        | MMC          | 4.14      |
| KNN        | FSCORE       | 7.04      |
| RF         | FSCORE       | 7.25      |
| SVM-G      | FSCORE       | 8.68      |
| KNN        | No           | 11.46     |
| KNN        | LLE          | 15.79     |
| KNN        | PCA          | 15.86     |
| NBayes     | No           | 18.00     |
| SVM-G      | LLE          | 18.36     |
| SVM-G      | MDS          | 18.36     |
| SVM-G      | MMDS         | 18.36     |
| KNN        | MDS          | 19.29     |
| KNN        | MMDS         | 19.29     |
| RF         | LSLS         | 20.43     |
| NBayes     | LLE          | 20.50     |
| KNN        | LPE          | 21.07     |
| NBayes     | FSCORE       | 23.71     |
| SVM-G      | Autoencoder  | 24.64     |
| KNN        | SNE          | 25.71     |
| SVM-G      | NPE          | 26.07     |
| NBayes     | MDS          | 26.29     |
| NBayes     | MMDS         | 26.29     |
| KNN        | NPE          | 26.71     |
| KNN        | SAVE         | 26.86     |
| RF         | LPE          | 27.21     |
| C4.5       | FSCORE       | 27.32     |
| C4.5       | No           | 29.68     |
| C4.5       | PCA          | 30.07     |
| SVM-G      | SNE          | 31.07     |
| SVM-G      | LSLS         | 31.29     |
| NBayes     | NPE          | 31.36     |
| KNN        | Autoencoder  | 31.64     |
| NBayes     | Autoencoder  | 32.00     |
| C4.5       | LPE          | 32.64     |
| NBayes     | PCA          | 33.86     |
| NBayes     | SNE          | 34.79     |
| KNN        | LSLS         | 35.00     |
| C4.5       | NPE          | 39.57     |
| RF         | SAVE         | 39.79     |
| C4.5       | MDS          | 40.00     |
| C4.5       | MMDS         | 41.21     |
| NBayes     | LSLS         | 42.07     |
| C4.5       | LLE          | 43.00     |

| Classifier | FR algorithm | Avg. Rank |
|------------|--------------|-----------|
| C4.5       | Autoencoder  | 44.21     |
| SVM-G      | LPE          | 44.46     |
| RF         | PCA          | 45.57     |
| RF         | NPE          | 46.93     |
| C4.5       | LSLS         | 47.29     |
| RF         | Autoencoder  | 48.86     |
| SVM-G      | RNDPROJ      | 49.54     |
| C4.5       | MMC          | 49.64     |
| SVM-G      | SAVE         | 51.14     |
| NBayes     | SAVE         | 55.89     |
| NBayes     | MMC          | 56.79     |
| KNN        | LEA          | 56.93     |
| RF         | RNDPROJ      | 57.71     |
| KNN        | RNDPROJ      | 58.21     |
| C4.5       | SAVE         | 60.14     |
| NBayes     | LEA          | 60.71     |
| C4.5       | SNE          | 60.79     |
| NBayes     | LPE          | 61.36     |
| RF         | MMC          | 61.36     |
| NBayes     | RNDPROJ      | 62.86     |
| SVM-G      | LEA          | 64.14     |
| KNN        | LFDA         | 64.29     |
| RF         | LEA          | 65.00     |
| RF         | LFDA         | 67.07     |
| RF         | MMDS         | 67.21     |
| RF         | MDS          | 67.71     |
| C4.5       | LFDA         | 68.07     |
| RF         | LLE          | 70.39     |
| RF         | SLPE         | 72.00     |
| KNN        | PFLPP        | 73.14     |
| RF         | PFLPP        | 74.00     |
| KNN        | SLPE         | 74.21     |
| C4.5       | RNDPROJ      | 75.68     |
| RF         | SNE          | 80.64     |
| NBayes     | SLPE         | 81.86     |
| C4.5       | SLPE         | 82.71     |
| NBayes     | LFDA         | 83.07     |
| SVM-G      | SLPE         | 83.36     |
| C4.5       | LEA          | 84.21     |
| C4.5       | PFLPP        | 84.21     |
| NBayes     | PFLPP        | 84.21     |
| SVM-G      | LFDA         | 84.21     |
| SVM-G      | MMC          | 84.21     |
| SVM-G      | PCA          | 84.21     |
| SVM-G      | PFLPP        | 84.21     |

**Table S6.** Comparison of average ranks using the MCC metric, the 18 FR preprocessing methods, including as baseline the non preprocessing option. Each ranking is performed by a different classifier in order to detect what is more suitable. The color code indicates the type of algorithm, **linear unsupervised**, **linear supervised** or **non-linear unsupervised**.

(a) KNN

| Feature reducer | Avg. Rank |
|-----------------|-----------|
| MMC             | 1.07      |
| FSCORE          | 3.86      |
| No              | 4.57      |
| LLE             | 5.29      |
| MDS             | 5.93      |
| MMDS            | 5.93      |
| PCA             | 6.29      |
| SNE             | 7.50      |
| LPPE            | 7.86      |
| NPE             | 8.07      |
| Autoencoder     | 10.79     |
| SAVE            | 11.29     |
| LSLS            | 12.57     |
| LEA             | 14.57     |
| RNDPROJ         | 15.43     |
| LFDA            | 16.14     |
| SLPE            | 16.79     |
| PFLPP           | 17.07     |

(b) SVM-G

| Feature reducer | Avg. Rank |
|-----------------|-----------|
| No              | 1.07      |
| FSCORE          | 3.86      |
| LLE             | 4.21      |
| MDS             | 4.21      |
| MMDS            | 4.21      |
| NPE             | 5.93      |
| Autoencoder     | 6.64      |
| SNE             | 7.21      |
| LSLS            | 8.79      |
| LPPE            | 9.71      |
| SAVE            | 11.57     |
| LEA             | 11.86     |
| RNDPROJ         | 12.43     |
| SLPE            | 15.71     |
| LFDA            | 15.89     |
| MMC             | 15.89     |
| PCA             | 15.89     |
| PFLPP           | 15.89     |

(c) C4.5

| Feature reducer | Avg. Rank |
|-----------------|-----------|
| FSCORE          | 3.46      |
| NPE             | 3.57      |
| MDS             | 4.43      |
| No              | 4.54      |
| LLE             | 4.71      |
| PCA             | 5.36      |
| MMDS            | 5.64      |
| LPPE            | 6.14      |
| Autoencoder     | 8.79      |
| LSLS            | 9.64      |
| MMC             | 9.93      |
| SNE             | 11.93     |
| SAVE            | 13.36     |
| RNDPROJ         | 15.25     |
| SLPE            | 15.82     |
| LEA             | 16.04     |
| PFLPP           | 16.04     |
| LFDA            | 16.36     |

(d) RF

| Feature reducer | Avg. Rank |
|-----------------|-----------|
| FSCORE          | 1.29      |
| No              | 2.07      |
| NPE             | 3.50      |
| Autoencoder     | 4.50      |
| LSLS            | 6.14      |
| LPPE            | 7.43      |
| SAVE            | 8.36      |
| MMDS            | 9.36      |
| MDS             | 9.64      |
| PCA             | 10.14     |
| LEA             | 11.00     |
| LLE             | 11.00     |
| MMC             | 11.36     |
| RNDPROJ         | 12.93     |
| SNE             | 14.93     |
| LFDA            | 15.64     |
| SLPE            | 15.64     |
| PFLPP           | 16.07     |

(e) NBayes

| Feature reducer | Avg. Rank |
|-----------------|-----------|
| FSCORE          | 2.86      |
| No              | 3.14      |
| LLE             | 3.79      |
| MDS             | 5.71      |
| MMDS            | 5.71      |
| NPE             | 6.14      |
| SNE             | 6.21      |
| PCA             | 6.29      |
| Autoencoder     | 7.00      |
| LSLS            | 9.43      |
| LPPE            | 12.50     |
| SAVE            | 12.71     |
| LEA             | 13.00     |
| MMC             | 13.86     |
| RNDPROJ         | 14.00     |
| PFLPP           | 16.14     |
| SLPE            | 16.21     |
| LFDA            | 16.29     |

**Table S11.** Average ranks using the MCC metric of the balancing strategies for (a) the best configuration that uses an FS method and (b) the best configuration that uses an FR method.

(a) SVM-RFE + SVM-G

| Balacing |           | Avg. Rank |
|----------|-----------|-----------|
| Prior    | Posterior |           |
| ROS      | No        | 3.11      |
| No       | ROS       | 3.11      |
| No       | SMOTE     | 3.46      |
| No       | No        | 3.57      |
| SMOTE    | No        | 3.86      |
| No       | RUS       | 4.25      |
| RUS      | No        | 6.64      |

(b) MMC + KNN

| Balacing |           | Avg. Rank |
|----------|-----------|-----------|
| Prior    | Posterior |           |
| No       | No        | 3.50      |
| No       | ROS       | 3.50      |
| No       | SMOTE     | 3.50      |
| No       | RUS       | 3.68      |
| SMOTE    | No        | 4.00      |
| ROS      | No        | 4.29      |
| RUS      | No        | 5.54      |

**Table S7.** Comparison of average ranks using the F<sub>1</sub>-Score metric, the 18 FR preprocessing methods, including as baseline the non preprocessing option. Each ranking is performed by a different classifier in order to detect what is more suitable. The color code indicates the type of algorithm, linear unsupervised, linear supervised or non-linear unsupervised.

(a) KNN

| Feature reducer | Avg. Rank |
|-----------------|-----------|
| MMC             | 1.07      |
| FSCORE          | 3.93      |
| No              | 4.57      |
| LLE             | 4.79      |
| MDS             | 5.79      |
| MMDS            | 5.79      |
| PCA             | 6.07      |
| SNE             | 8.00      |
| LPE             | 8.21      |
| NPE             | 8.21      |
| Autoencoder     | 10.64     |
| SAVE            | 11.43     |
| LSLS            | 12.50     |
| LFDA            | 14.79     |
| LEA             | 14.93     |
| RNDPROJ         | 15.57     |
| SLPE            | 17.29     |
| PFLPP           | 17.43     |

(b) SVM-G

| Feature reducer | Avg. Rank |
|-----------------|-----------|
| No              | 1.18      |
| FSCORE          | 3.25      |
| LLE             | 4.36      |
| MDS             | 4.36      |
| MMDS            | 4.36      |
| Autoencoder     | 6.29      |
| NPE             | 6.50      |
| SNE             | 7.57      |
| LSLS            | 8.50      |
| LPE             | 9.79      |
| SAVE            | 11.21     |
| MMC             | 12.79     |
| LFDA            | 13.68     |
| RNDPROJ         | 13.89     |
| LEA             | 13.93     |
| PFLPP           | 15.54     |
| SLPE            | 16.07     |
| PCA             | 17.75     |

(c) C4.5

| Feature reducer | Avg. Rank |
|-----------------|-----------|
| FSCORE          | 2.82      |
| No              | 3.68      |
| PCA             | 4.71      |
| MDS             | 4.93      |
| NPE             | 5.07      |
| LLE             | 5.86      |
| MMDS            | 5.86      |
| LPE             | 5.93      |
| Autoencoder     | 7.71      |
| LSLS            | 9.14      |
| MMC             | 11.64     |
| SAVE            | 11.93     |
| SNE             | 12.86     |
| LFDA            | 13.07     |
| RNDPROJ         | 15.32     |
| SLPE            | 16.61     |
| LEA             | 16.93     |
| PFLPP           | 16.93     |

(d) RF

| Feature reducer | Avg. Rank |
|-----------------|-----------|
| FSCORE          | 1.21      |
| No              | 2.93      |
| NPE             | 3.93      |
| Autoencoder     | 5.50      |
| MMC             | 7.00      |
| LSLS            | 7.29      |
| SAVE            | 7.71      |
| LFDA            | 9.43      |
| LPE             | 9.79      |
| SLPE            | 11.64     |
| MDS             | 11.93     |
| MMDS            | 12.00     |
| LEA             | 12.21     |
| RNDPROJ         | 12.21     |
| PCA             | 12.57     |
| PFLPP           | 12.64     |
| LLE             | 13.50     |
| SNE             | 17.50     |

(e) NBayes

| Feature reducer | Avg. Rank |
|-----------------|-----------|
| FSCORE          | 2.86      |
| No              | 3.07      |
| LLE             | 3.71      |
| MDS             | 5.50      |
| MMDS            | 5.50      |
| NPE             | 6.14      |
| PCA             | 6.36      |
| Autoencoder     | 6.86      |
| SNE             | 7.21      |
| LSLS            | 9.00      |
| RNDPROJ         | 12.14     |
| MMC             | 12.21     |
| LPE             | 12.50     |
| LEA             | 12.79     |
| SAVE            | 14.50     |
| SLPE            | 16.71     |
| LFDA            | 16.86     |
| PFLPP           | 17.07     |

**Table S8.** Comparison of average ranks using the Kappa metric, the 18 FR preprocessing methods, including as baseline the non preprocessing option. Each ranking is performed by a different classifier in order to detect what is more suitable. The color code indicates the type of algorithm, linear unsupervised, linear supervised or non-linear unsupervised.

(a) KNN

| Feature reducer | Avg. Rank |
|-----------------|-----------|
| MMC             | 1.07      |
| FSCORE          | 3.86      |
| No              | 4.57      |
| LLE             | 4.93      |
| MDS             | 5.89      |
| MMDS            | 5.89      |
| PCA             | 6.21      |
| SNE             | 7.50      |
| NPE             | 8.14      |
| LPE             | 8.29      |
| Autoencoder     | 10.79     |
| SAVE            | 11.29     |
| LSLS            | 12.57     |
| LEA             | 14.64     |
| RNDPROJ         | 15.43     |
| LFDA            | 16.14     |
| SLPE            | 16.79     |
| PFLPP           | 17.00     |

(b) SVM-G

| Feature reducer | Avg. Rank |
|-----------------|-----------|
| No              | 1.18      |
| FSCORE          | 3.25      |
| LLE             | 4.43      |
| MDS             | 4.43      |
| MMDS            | 4.43      |
| NPE             | 6.07      |
| Autoencoder     | 6.29      |
| SNE             | 7.29      |
| LSLS            | 8.64      |
| LPE             | 9.71      |
| SAVE            | 11.43     |
| LEA             | 12.00     |
| RNDPROJ         | 12.57     |
| SLPE            | 15.71     |
| LFDA            | 15.89     |
| MMC             | 15.89     |
| PCA             | 15.89     |
| PFLPP           | 15.89     |

(c) C4.5

| Feature reducer | Avg. Rank |
|-----------------|-----------|
| FSCORE          | 3.32      |
| NPE             | 4.07      |
| No              | 4.11      |
| MDS             | 4.64      |
| LLE             | 5.00      |
| PCA             | 5.14      |
| MMDS            | 5.57      |
| LPE             | 5.93      |
| Autoencoder     | 8.36      |
| LSLS            | 9.21      |
| MMC             | 11.43     |
| SNE             | 11.64     |
| SAVE            | 13.21     |
| RNDPROJ         | 15.18     |
| SLPE            | 15.82     |
| LEA             | 16.04     |
| PFLPP           | 16.04     |
| LFDA            | 16.29     |

(d) RF

| Feature reducer | Avg. Rank |
|-----------------|-----------|
| FSCORE          | 1.21      |
| No              | 2.21      |
| NPE             | 3.50      |
| Autoencoder     | 4.50      |
| LSLS            | 6.00      |
| SAVE            | 7.36      |
| LPE             | 7.71      |
| MDS             | 10.14     |
| MMDS            | 10.21     |
| PCA             | 10.29     |
| LEA             | 10.86     |
| MMC             | 10.86     |
| LLE             | 11.14     |
| RNDPROJ         | 12.79     |
| SNE             | 15.07     |
| SLPE            | 15.57     |
| LFDA            | 15.71     |
| PFLPP           | 15.86     |

(e) NBayes

| Feature reducer | Avg. Rank |
|-----------------|-----------|
| No              | 2.71      |
| FSCORE          | 2.93      |
| LLE             | 4.00      |
| MDS             | 5.71      |
| MMDS            | 5.71      |
| PCA             | 6.36      |
| NPE             | 6.50      |
| SNE             | 6.57      |
| Autoencoder     | 6.79      |
| LSLS            | 9.21      |
| LPE             | 12.29     |
| LEA             | 12.86     |
| SAVE            | 13.00     |
| MMC             | 13.71     |
| RNDPROJ         | 14.00     |
| PFLPP           | 16.14     |
| SLPE            | 16.21     |
| LFDA            | 16.29     |

**Table S9.** Comparison of average ranks using the AUC metric, the 18 FR preprocessing methods, including as baseline the non preprocessing option. Each ranking is performed by a different classifier in order to detect what is more suitable. The color code indicates the type of algorithm, linear unsupervised, linear supervised or non-linear unsupervised.

(a) KNN

| Feature reducer | Avg. Rank |
|-----------------|-----------|
| MMC             | 1.07      |
| FSCORE          | 3.93      |
| No              | 4.57      |
| LLE             | 4.79      |
| MDS             | 5.79      |
| MMDS            | 5.79      |
| PCA             | 6.07      |
| SNE             | 8.00      |
| LPE             | 8.21      |
| NPE             | 8.21      |
| Autoencoder     | 10.64     |
| SAVE            | 11.43     |
| LSLS            | 12.50     |
| LFDA            | 14.79     |
| LEA             | 14.93     |
| RNDPROJ         | 15.57     |
| SLPE            | 17.29     |
| PFLPP           | 17.43     |

(b) SVM-G

| Feature reducer | Avg. Rank |
|-----------------|-----------|
| No              | 1.18      |
| FSCORE          | 3.25      |
| LLE             | 4.36      |
| MDS             | 4.36      |
| MMDS            | 4.36      |
| Autoencoder     | 6.29      |
| NPE             | 6.50      |
| SNE             | 7.57      |
| LSLS            | 8.50      |
| LPE             | 9.79      |
| SAVE            | 11.21     |
| MMC             | 12.79     |
| LFDA            | 13.68     |
| RNDPROJ         | 13.89     |
| LEA             | 13.93     |
| PFLPP           | 15.54     |
| SLPE            | 16.07     |
| PCA             | 17.75     |

(c) C4.5

| Feature reducer | Avg. Rank |
|-----------------|-----------|
| FSCORE          | 2.82      |
| No              | 3.68      |
| PCA             | 4.71      |
| MDS             | 4.93      |
| NPE             | 5.07      |
| LLE             | 5.86      |
| MMDS            | 5.86      |
| LPE             | 5.93      |
| Autoencoder     | 7.71      |
| LSLS            | 9.14      |
| MMC             | 11.64     |
| SAVE            | 11.93     |
| SNE             | 12.86     |
| LFDA            | 13.07     |
| RNDPROJ         | 15.32     |
| SLPE            | 16.61     |
| LEA             | 16.93     |

(d) RF

| Feature reducer | Avg. Rank |
|-----------------|-----------|
| FSCORE          | 1.21      |
| No              | 2.93      |
| NPE             | 3.93      |
| Autoencoder     | 5.50      |
| MMC             | 7.00      |
| LSLS            | 7.29      |
| SAVE            | 7.71      |
| LFDA            | 9.43      |
| LPE             | 9.79      |
| SLPE            | 11.64     |
| MDS             | 11.93     |
| MMDS            | 12.00     |
| LEA             | 12.21     |
| RNDPROJ         | 12.21     |
| PCA             | 12.57     |
| PFLPP           | 12.64     |
| LLE             | 13.50     |
| SNE             | 17.50     |

(e) NBayes

| Feature reducer | Avg. Rank |
|-----------------|-----------|
| FSCORE          | 2.86      |
| No              | 3.07      |
| LLE             | 3.71      |
| MDS             | 5.50      |
| MMDS            | 5.50      |
| NPE             | 6.14      |
| PCA             | 6.36      |
| Autoencoder     | 6.86      |
| SNE             | 7.21      |
| LSLS            | 9.00      |
| RNDPROJ         | 12.14     |
| MMC             | 12.21     |
| LPE             | 12.50     |
| LEA             | 12.79     |
| SAVE            | 14.50     |
| SLPE            | 16.71     |
| LFDA            | 16.86     |
| PFLPP           | 17.07     |

**Table S10.** Comparison of average ranks using the G-mean metric, the 18 FR preprocessing methods, including as baseline the non preprocessing option. Each ranking is performed by a different classifier in order to detect what is more suitable. The color code indicates the type of algorithm, linear unsupervised, linear supervised or non-linear unsupervised.

(a) KNN

| Feature reducer | Avg. Rank |
|-----------------|-----------|
| MMC             | 1.50      |
| FSCORE          | 2.71      |
| No              | 4.36      |
| PCA             | 5.36      |
| LLE             | 5.71      |
| LPE             | 6.64      |
| MDS             | 7.36      |
| MMDS            | 7.36      |
| SNE             | 8.21      |
| SAVE            | 9.57      |
| NPE             | 9.71      |
| Autoencoder     | 11.21     |
| LSLS            | 11.29     |
| LEA             | 14.50     |
| RNDPROJ         | 14.71     |
| LFDA            | 15.79     |
| PFLPP           | 17.43     |
| SLPE            | 17.57     |

(b) SVM-G

| Feature reducer | Avg. Rank |
|-----------------|-----------|
| No              | 1.18      |
| FSCORE          | 2.46      |
| LLE             | 4.79      |
| MDS             | 4.79      |
| MMDS            | 4.79      |
| Autoencoder     | 6.21      |
| NPE             | 7.07      |
| LSLS            | 7.57      |
| SNE             | 8.36      |
| LPE             | 9.79      |
| RNDPROJ         | 10.54     |
| SAVE            | 11.14     |
| LEA             | 12.57     |
| SLPE            | 15.75     |
| LFDA            | 16.00     |
| MMC             | 16.00     |
| PCA             | 16.00     |
| PFLPP           | 16.00     |

(c) C4.5

| Feature reducer | Avg. Rank |
|-----------------|-----------|
| FSCORE          | 3.18      |
| No              | 3.32      |
| PCA             | 3.57      |
| LPE             | 4.79      |
| MDS             | 6.14      |
| NPE             | 6.14      |
| MMDS            | 6.71      |
| LLE             | 6.93      |
| Autoencoder     | 7.79      |
| LSLS            | 8.29      |
| MMC             | 9.86      |
| SAVE            | 12.29     |
| SNE             | 12.57     |
| LFDA            | 13.86     |
| RNDPROJ         | 15.04     |
| SLPE            | 16.68     |
| LEA             | 16.93     |
| PFLPP           | 16.93     |

(d) RF

| Feature reducer | Avg. Rank |
|-----------------|-----------|
| No              | 1.61      |
| FSCORE          | 2.39      |
| LSLS            | 4.00      |
| LPE             | 4.64      |
| SAVE            | 5.79      |
| NPE             | 6.43      |
| Autoencoder     | 7.29      |
| PCA             | 8.64      |
| RNDPROJ         | 9.57      |
| MMC             | 10.14     |
| LEA             | 11.71     |
| LFDA            | 12.29     |
| MMDS            | 12.79     |
| MDS             | 12.86     |
| LLE             | 14.07     |
| SLPE            | 14.64     |
| PFLPP           | 15.07     |
| SNE             | 17.07     |

(e) NBayes

| Feature reducer | Avg. Rank |
|-----------------|-----------|
| LLE             | 3.50      |
| No              | 3.57      |
| MDS             | 5.14      |
| MMDS            | 5.14      |
| FSCORE          | 5.21      |
| NPE             | 6.07      |
| Autoencoder     | 6.43      |
| PCA             | 6.86      |
| SNE             | 7.07      |
| LSLS            | 9.14      |
| SAVE            | 11.57     |
| MMC             | 12.00     |
| LEA             | 12.71     |
| LPE             | 13.00     |
| RNDPROJ         | 13.14     |
| SLPE            | 16.50     |
| LFDA            | 16.86     |
| PFLPP           | 17.07     |

**Table S12.** Average ranks using the F<sub>1</sub>-Score metric of the balancing strategies for (a) the best configuration that uses an FS method and (b) the best configuration that uses an FR method.

(a) SVM-RFE + SVM-G

| Balacing |           | Avg. Rank |
|----------|-----------|-----------|
| Prior    | Posterior |           |
| ROS      | No        | 2.96      |
| No       | ROS       | 3.11      |
| No       | SMOTE     | 3.61      |
| No       | No        | 3.86      |
| SMOTE    | No        | 3.86      |
| No       | RUS       | 4.11      |
| RUS      | No        | 6.50      |

(b) MMC + KNN

| Balacing |           | Avg. Rank |
|----------|-----------|-----------|
| Prior    | Posterior |           |
| No       | No        | 3.29      |
| No       | ROS       | 3.29      |
| No       | SMOTE     | 3.29      |
| No       | RUS       | 3.46      |
| ROS      | No        | 4.57      |
| SMOTE    | No        | 4.57      |
| RUS      | No        | 5.54      |

**Table S13.** Average ranks using the Kappa metric of the balancing strategies for (a) the best configuration that uses an FS method and (b) the best configuration that uses an FR method.

(a) SVM-RFE + SVM-G

| Balacing |           | Avg. Rank |
|----------|-----------|-----------|
| Prior    | Posterior |           |
| ROS      | No        | 3.04      |
| No       | ROS       | 3.18      |
| No       | SMOTE     | 3.46      |
| No       | No        | 3.71      |
| SMOTE    | No        | 3.86      |
| No       | RUS       | 4.25      |
| RUS      | No        | 6.50      |

(b) MMC + KNN

| Balacing |           | Avg. Rank |
|----------|-----------|-----------|
| Prior    | Posterior |           |
| No       | No        | 3.43      |
| No       | ROS       | 3.43      |
| No       | SMOTE     | 3.43      |
| No       | RUS       | 3.61      |
| SMOTE    | No        | 4.00      |
| ROS      | No        | 4.57      |
| RUS      | No        | 5.54      |

**Table S14.** Average ranks using the AUC metric of the balancing strategies for (a) the best configuration that uses an FS method and (b) the best configuration that uses an FR method.

**(a)** SVM-RFE + SVM-G

| Balacing |           | Avg. Rank |
|----------|-----------|-----------|
| Prior    | Posterior |           |
| No       | No        | 3.04      |
| No       | ROS       | 3.25      |
| No       | SMOTE     | 3.46      |
| ROS      | No        | 3.68      |
| RUS      | No        | 4.68      |
| SMOTE    | No        | 4.86      |
| No       | RUS       | 5.04      |

**(b)** MMC + KNN

| Balacing |           | Avg. Rank |
|----------|-----------|-----------|
| Prior    | Posterior |           |
| SMOTE    | No        | 1.57      |
| ROS      | No        | 2.68      |
| No       | No        | 4.11      |
| No       | ROS       | 4.11      |
| No       | SMOTE     | 4.11      |
| No       | RUS       | 4.61      |
| RUS      | No        | 6.82      |

**Table S15.** Average ranks using the G-Mean metric of the balancing strategies for (a) the best configuration that uses an FS method and (b) the best configuration that uses an FR method.

**(a)** SVM-RFE + SVM-G

| Balacing |           | Avg. Rank |
|----------|-----------|-----------|
| Prior    | Posterior |           |
| No       | No        | 3.04      |
| No       | ROS       | 3.25      |
| No       | SMOTE     | 3.46      |
| ROS      | No        | 3.68      |
| RUS      | No        | 4.68      |
| SMOTE    | No        | 4.86      |
| No       | RUS       | 5.04      |

**(b)** MMC + KNN

| Balacing |           | Avg. Rank |
|----------|-----------|-----------|
| Prior    | Posterior |           |
| SMOTE    | No        | 1.57      |
| ROS      | No        | 2.68      |
| No       | No        | 4.11      |
| No       | ROS       | 4.11      |
| No       | SMOTE     | 4.11      |
| No       | RUS       | 4.61      |
| RUS      | No        | 6.82      |
